# Supplementary material for: Higher Risk of Infections with PI3K–AKT–mTOR Pathway Inhibitors in Patients with Advanced Solid Tumors on Phase I Clinical Trials
Source: Oxford University Press journal article supplement (doi:10.1158/1078-0432.ccr-14-2424), 2015-02-03
Supplement: 10780432ccr142424-sup-138064_2_supp_2838427_n555w5.docx [file 10780432ccr142424-sup-138064_2_supp_2838427_n555w5.docx]

Supplementary Figure
